# Supplementary material
Source: PubMed Central journal article supplement (PMC3630793)
Supplement: NIHMS212554-supplement-01.pdf [file NIHMS212554-supplement-01.pdf]

| <b>Peak location (Brodmann area)</b>                 |                              |     |    |                      |         |  |
|------------------------------------------------------|------------------------------|-----|----|----------------------|---------|--|
| Regions included in cluster<br>(% volume of cluster) | <u>Talairach coordinates</u> |     |    | Volume<br>( $\mu$ l) | T-score |  |
|                                                      | x                            | y   | z  |                      |         |  |
| <u>Incongruous &gt; Congruous</u>                    |                              |     |    |                      |         |  |
| <b>L inferior frontal gyrus (BA 44/45)</b>           | -44                          | 14  | 26 | 1242                 | 5.92    |  |
| L inferior frontal gyrus [p. triangularis] (90.2%)   |                              |     |    |                      |         |  |
| L inferior frontal gyrus [p. opercularis] (8.7%)     |                              |     |    |                      |         |  |
| <u>Congruous &gt; Incongruous</u>                    |                              |     |    |                      |         |  |
| <b>R inferior parietal lobule (BA 40)</b>            | 44                           | -38 | 54 | 7398                 | -6.54   |  |
| R postcentral gyrus (53.3%)                          |                              |     |    |                      |         |  |
| R supramarginal gyrus (21.2%)                        |                              |     |    |                      |         |  |
| R inferior parietal lobule (16.2%)                   |                              |     |    |                      |         |  |
| <b>R insula (BA 13)</b>                              | 28                           | -2  | 14 | 2106                 | -5.59   |  |
| R insula (41.4%)                                     |                              |     |    |                      |         |  |
| R rolandic operculum (27.4%)                         |                              |     |    |                      |         |  |
| R putamen (8.3%)                                     |                              |     |    |                      |         |  |
| <b>L insula (BA 13)</b>                              | -34                          | -4  | 14 | 2025                 | -6.54   |  |
| L insula (41.2%)                                     |                              |     |    |                      |         |  |
| L rolandic operculum (35.7%)                         |                              |     |    |                      |         |  |
| L inferior frontal gyrus [p. opercularis] (9.1%)     |                              |     |    |                      |         |  |
| R superior medial gyrus (8.8%)                       |                              |     |    |                      |         |  |
| <b>R cingulate gyrus (BA 31)</b>                     | 2                            | -28 | 42 | 1998                 | -6.29   |  |
| R middle cingulate cortex (62.9%)                    |                              |     |    |                      |         |  |
| L middle cingulate cortex (27.2%)                    |                              |     |    |                      |         |  |
| R SMA (9.3%)                                         |                              |     |    |                      |         |  |
| <b>L posterior cingulate (BA 31)</b>                 | -10                          | -52 | 24 | 1917                 | -5.95   |  |
| L precuneus (45.9%)                                  |                              |     |    |                      |         |  |
| R precuneus (33.5%)                                  |                              |     |    |                      |         |  |
| L posterior cingulate cortex (11.2%)                 |                              |     |    |                      |         |  |
| <b>L superior frontal gyrus (BA 6)</b>               | -16                          | 28  | 54 | 1647                 | -7.99   |  |
| L superior frontal gyrus (74%)                       |                              |     |    |                      |         |  |
| L superior medial gyrus (14.1%)                      |                              |     |    |                      |         |  |
| L middle frontal gyrus (5.8%)                        |                              |     |    |                      |         |  |
| <b>L caudate</b>                                     | -10                          | 16  | 8  | 1620                 | -8.32   |  |
| L caudate nucleus (60.7%)                            |                              |     |    |                      |         |  |
| L olfactory cortex (10.7%)                           |                              |     |    |                      |         |  |
| <b>R anterior cingulate (BA 24)</b>                  | 10                           | 32  | 14 | 756                  | -6.44   |  |
| <b>L middle temporal gyrus (BA 39)</b>               | -44                          | -62 | 18 | 702                  | -6.47   |  |
