# Supplementary material
Source: PubMed Central journal article supplement (PMC3630793)
Supplement: NIHMS212554-supplement-02.pdf [file NIHMS212554-supplement-02.pdf]

| <b>Peak location (Brodmann area)</b>                 | <b>Talairach coordinates</b> |     |    | <b>Volume</b> | <b>T-score</b> |
|------------------------------------------------------|------------------------------|-----|----|---------------|----------------|
| Regions included in cluster<br>(% volume of cluster) | x                            | y   | z  | ( $\mu$ l)    |                |
| <u>Congruous &gt; Incongruous</u>                    |                              |     |    |               |                |
| <b>R postcentral gyrus (BA 40)</b>                   | 58                           | -26 | 26 | 26541         | -9.201         |
| R supramarginal gyrus (29.7%)                        |                              |     |    |               |                |
| R precentral gyrus (23.6%)                           |                              |     |    |               |                |
| R postcentral gyrus (20.8%)                          |                              |     |    |               |                |
| R rolandic operculum (6.4%)                          |                              |     |    |               |                |
| R superior temporal gyrus (5.2%)                     |                              |     |    |               |                |
| <b>L inferior parietal lobule (BA 40)</b>            | -56                          | -26 | 26 | 16578         | -7.98          |
| L supramarginal gyrus (21.8%)                        |                              |     |    |               |                |
| L postcentral gyrus (12.5%)                          |                              |     |    |               |                |
| L rolandic operculum (10.7%)                         |                              |     |    |               |                |
| L inferior parietal lobule (6.7%)                    |                              |     |    |               |                |
| L putamen (6.1%)                                     |                              |     |    |               |                |
| <b>R cingulate (BA 24)</b>                           | 4                            | 2   | 38 | 8397          | -6.6           |
| L middle cingulate cortex (20.7%)                    |                              |     |    |               |                |
| L SMA (19.8%)                                        |                              |     |    |               |                |
| R middle cingulate cortex (19.6%)                    |                              |     |    |               |                |
| R SMA (15.3%)                                        |                              |     |    |               |                |
| L anterior cingulate cortex (7.2%)                   |                              |     |    |               |                |
| <b>R putamen</b>                                     | 22                           | -14 | 12 | 8316          | -6             |
| R putamen (18.8%)                                    |                              |     |    |               |                |
| R rolandic operculum (17.5%)                         |                              |     |    |               |                |
| R insula (13.5%)                                     |                              |     |    |               |                |
| R pallidum (5.6%)                                    |                              |     |    |               |                |
| R superior temporal gyrus (5.1%)                     |                              |     |    |               |                |
| <b>L precentral gyrus (BA 6)</b>                     | -34                          | -14 | 62 | 1539          | -5.3           |
| L precentral gyrus (81.4%)                           |                              |     |    |               |                |
| L superior frontal gyrus (6.6%)                      |                              |     |    |               |                |
| L middle frontal gyrus (6.2%)                        |                              |     |    |               |                |
| <b>L posterior cingulate (BA 30)</b>                 | -22                          | -56 | 18 | 864           | -5.26          |
| L superior occipital gyrus (18%)                     |                              |     |    |               |                |
| <b>R anterior cingulate (BA 24)</b>                  | 2                            | 38  | 0  | 648           | -4.73          |
| R mid orbital gyrus (69.3%)                          |                              |     |    |               |                |
| R rectal gyrus (19.9%)                               |                              |     |    |               |                |
| L mid orbital gyrus (7.6%)                           |                              |     |    |               |                |
